## **Correction: As the Antarctic Ice Pack Recedes, a Fragile Ecosystem Hangs in the Balance**

Liza Gross

DOI: [10.1371/journal.pbio.0030127](https://doi.org/10.1371/journal.pbio.0030127)

In *PLoS Biology*, volume 3, issue 4.

The figure credits for Figures 1 and 2 are missing from the PDF versions of the article. For Figure 1, images are courtesy of Langdon Quetin and Robin Ross, researchers at the Marine Science Institute, University of California, Santa Barbara, and funded by the Office of Polar Programs, National Science Foundation. For Figure 2, images are courtesy of Donna Fraser.

This correction note may be found online at DOI: [10.1371/journal.pbio. 10.1371/journal.pbio.0030224](https://doi.org/10.1371/journal.pbio.10.1371/journal.pbio.0030224).

Published May 17, 2005

Citation: (2005) Correction: As the Antarctic ice pack recedes, a fragile ecosystem hangs in the balance. *PLoS Biol* 3(6): e224.
